# Supplementary material
Source: PubMed Central journal article supplement (PMC7361411)
Supplement: TRF-60-2597-s001.pdf [file TRF-60-2597-s001.pdf]

*S.1 Detailed information of blood donation from January 1 to March 31, 2020,  
compared with the same time period in 2019*

|                                            | 2019         | 2020         | <i>P</i>            |
|--------------------------------------------|--------------|--------------|---------------------|
| Number of blood donations                  | 70056        | 59728        | -                   |
| Number of blood donors                     | 64379        | 55203        | -                   |
| Gender*                                    |              |              |                     |
| Male                                       | 40790 (63.4) | 35667 (64.6) | <.001 <sup>§</sup>  |
| Female                                     | 23589 (36.6) | 19536 (35.4) |                     |
| Age*†                                      | 30.7 ± 10.1  | 33.7 ± 9.7   | <.001 <sup>  </sup> |
| Donation frequency*†                       | 4.5 ± 10.8   | 5.4 ± 11.9   | <.001 <sup>  </sup> |
| Donation type*                             |              |              |                     |
| Whole blood                                | 59191 (91.9) | 51104 (92.6) | <.001 <sup>§</sup>  |
| Platelet                                   | 5188 (8.1)   | 4099 (7.4)   |                     |
| Donation form*                             |              |              |                     |
| Street whole blood donation                | 38843 (65.6) | 27175 (53.2) | <.001 <sup>§</sup>  |
| Group whole blood donation                 | 20348 (34.4) | 23929 (46.8) |                     |
| Non-hospital group                         | 13069 (64.2) | 14139 (59.1) | <.001 <sup>§</sup>  |
| Hospital                                   | 7279 (35.8)  | 9790 (40.9)  |                     |
| Total number of positive results‡          | 709 (1.01)   | 545 (0.91)   | .068 <sup>§</sup>   |
| HBsAg                                      | 417 (0.60)   | 158 (0.26)   | <.001 <sup>§</sup>  |
| Anti-HCV                                   | 54 (0.08)    | 17 (0.03)    | <.001 <sup>§</sup>  |
| Anti-HIV                                   | 9 (0.01)     | 6 (0.01)     | .640 <sup>§</sup>   |
| Anti-TP                                    | 138 (0.20)   | 95 (0.16)    | .108 <sup>§</sup>   |
| Nucleic acid tests of HBV,<br>HCV, and HIV | 60 (0.09)    | 121 (0.20)   | <.001 <sup>§</sup>  |
| Two items or above                         | 31 (0.04)    | 148 (0.25)   | <.001 <sup>§</sup>  |

Data presented as no. (%), unless otherwise stated.

\* The denominators of gender, donation type, and donation form were number of blood donors. Age and donation frequency were data of blood donors' last donation.

† Data presented as mean ± standard deviation.

‡ The denominators of positive results were number of blood donations.

§ Chi-square test *P*.

|| Independent-sample *t* test *P*.

*Note:* Only gender, age, and donation frequency were compared, because other personal information, such as educational level, marital status, or occupation, were not required before donation.

*S.2 Detailed information of whole blood donation from January 1 to March 31, 2020*

*compared with the same time period in 2019*

|                       | 2019         |              |             | 2020         |              |             |
|-----------------------|--------------|--------------|-------------|--------------|--------------|-------------|
|                       | SWBDs        | GWBDs        |             | SWBDs        | GWBDs        |             |
|                       |              | Non-hospital | Hospital    |              | Non-hospital | Hospital    |
| Gender*               |              |              |             |              |              |             |
| Male                  | 23692 (61.0) | 9004 (68.9)  | 3283 (45.1) | 10089 (65.7) | 21204 (70.9) | 4374 (43.9) |
| Female                | 15151 (39.0) | 4065 (31.1)  | 3996 (54.9) | 5256 (34.3)  | 8694 (29.1)  | 5586 (56.1) |
| Age**†                | 30.6 ± 9.6   | 30.5 ± 10.5  | 32.2 ± 9.3  | 33.9 ± 10.1  | 32.9 ± 9.2   | 33.9 ± 9.6  |
| Donation frequency**† | 2.8 ± 3.2    | 6.4 ± 14.4   | 3.6 ± 3.4   | 4.6 ± 5.3    | 3.5 ± 3.4    | 6.4 ± 15.5  |

Data presented as no. (%), unless otherwise stated.

\* The denominators of gender, donation type and donation form were number of blood donors. Age and donation frequency were data of blood donors' last donation.

† Data presented as mean ± standard deviation.

*S.3 Comparisons of first-time and repeat SWBDs who received the questionnaire by gender and age in the survey*

|                  | First-time SWBDs | Repeat SWBDs | <i>P</i>           |
|------------------|------------------|--------------|--------------------|
| Gender           |                  |              |                    |
| Female           | 2083 (67.6)      | 3998 (66.2)  | .172 <sup>†</sup>  |
| Male             | 997 (32.4)       | 2039 (38.8)  |                    |
| Age <sup>*</sup> | 32.3 ± 9.2       | 36.4 ± 9.9   | <.001 <sup>‡</sup> |

Data presented as no. (%), unless otherwise stated.

\* Data presented as mean ± standard deviation.

† Chi-square test *P*.

‡ Independent-sample *t* test *P*.

*S.4 Summary and comparisons of first-time and repeat SWBDs who completed the questionnaire in the survey*

|                      | First-time SWBDs | Repeat SWBDs | <i>P</i>           |
|----------------------|------------------|--------------|--------------------|
| Gender               |                  |              |                    |
| Female               | 165 (56.7)       | 826 (61.9)   | .023 <sup>†</sup>  |
| Male                 | 126 (43.3)       | 467 (36.1)   |                    |
| Age*                 | 30.6 ± 8.7       | 35.7 ± 9.7   | <.001 <sup>‡</sup> |
| Occupation           |                  |              |                    |
| Fixed job            | 124 (42.6)       | 652 (50.4)   | .590 <sup>†</sup>  |
| Student              | 32 (11.0)        | 76 (5.9)     |                    |
| Non-working          | 20 (6.8)         | 88 (6.8)     |                    |
| Others               | 115 (39.5)       | 477 (36.9)   |                    |
| Education level      |                  |              |                    |
| Junior high or below | 51 (17.5)        | 132 (10.2)   | <.001 <sup>†</sup> |
| Secondary school     | 77 (26.5)        | 254 (19.6)   |                    |
| College              | 154 (52.9)       | 836 (64.7)   |                    |
| Master or above      | 9 (3.1)          | 71 (5.5)     |                    |
| Relational closeness |                  |              |                    |
| No                   | 124 (42.6)       | 582 (45.0)   | .473 <sup>†</sup>  |
| Yes                  | 167 (57.4)       | 711 (55.0)   |                    |

Data presented as no. (%), unless otherwise stated.

\* Data presented as mean ± standard deviation.

<sup>†</sup> Chi-square test *P*.

<sup>‡</sup> Independent-sample *t* test *P*.

*S.5 Total variance explained for the factor analysis (initial) in the survey*

| Component | Initial Eigenvalues |               |              | Rotation Sums of Squared Loadings |               |              |
|-----------|---------------------|---------------|--------------|-----------------------------------|---------------|--------------|
|           | Total               | % of Variance | Cumulative % | Total                             | % of Variance | Cumulative % |
| 1         | 4.41                | 24.51         | 24.51        | 2.81                              | 15.60         | 15.60        |
| 2         | 3.47                | 19.30         | 43.81        | 2.67                              | 14.83         | 30.43        |
| 3         | 1.86                | 10.35         | 54.16        | 2.35                              | 13.08         | 43.51        |
| 4         | 1.60                | 8.89          | 63.05        | 2.09                              | 11.59         | 55.09        |

*S.6 Varimax rotated factor loadings for the factor analysis (initial) in the survey*

| Item                          | Factor |       |       |       | Common factor variance |            |
|-------------------------------|--------|-------|-------|-------|------------------------|------------|
|                               | 1      | 2     | 3     | 4     | Initial                | Extraction |
| Rated anxious                 | -0.19  | 0.76  | -0.06 | -0.35 | 0.64                   | 0.74       |
| Rated worried                 | -0.18  | 0.75  | -0.04 | -0.37 | 0.64                   | 0.74       |
| Rated fearful                 | -0.20  | 0.73  | -0.07 | -0.34 | 0.61                   | 0.70       |
| Get infected of COVID-19      | -0.19  | 0.60  | -0.13 | -0.06 | 0.41                   | 0.41       |
| Impact of COVID-19            | -0.09  | 0.43  | -0.04 | -0.14 | 0.23                   | 0.22       |
| Knowledge about policy        | 0.83   | 0.12  | -0.38 | 0.04  | 0.75                   | 0.85       |
| Knowledge about procedure     | 0.81   | 0.17  | -0.34 | 0.04  | 0.72                   | 0.80       |
| Knowledge about requirements  | 0.80   | 0.15  | -0.32 | 0.05  | 0.70                   | 0.77       |
| How urgent                    | 0.51   | 0.32  | 0.68  | 0.11  | 0.68                   | 0.83       |
| How important                 | 0.52   | 0.25  | 0.65  | 0.10  | 0.65                   | 0.76       |
| How much lost                 | 0.36   | 0.21  | 0.43  | 0.04  | 0.33                   | 0.36       |
| Blood shortage                | 0.38   | 0.14  | 0.35  | 0.04  | 0.28                   | 0.29       |
| Get infected at donation site | -0.37  | 0.53  | -0.14 | 0.60  | 0.60                   | 0.80       |
| Ensure safety                 | -0.32  | 0.40  | -0.16 | 0.40  | 0.55                   | 0.63       |
| Risk after donation           | -0.34  | 0.12  | -0.09 | 0.23  | 0.40                   | 0.44       |
| Get infected on the way       | -0.30  | 0.53  | -0.14 | 0.48  | 0.22                   | 0.20       |
| Impact of blood donation      | 0.44   | -0.03 | 0.03  | -0.07 | 0.24                   | 0.20       |
| Blood usage                   | 0.44   | 0.03  | 0.08  | -0.09 | 0.24                   | 0.21       |

*S.7 Total variance explained for the factor analysis (final) in the survey*

| Component | Initial Eigenvalues |               |              | Rotation Sums of Squared Loadings |               |              |
|-----------|---------------------|---------------|--------------|-----------------------------------|---------------|--------------|
|           | Total               | % of Variance | Cumulative % | Total                             | % of Variance | Cumulative % |
| 1         | 3.72                | 28.60         | 28.60        | 2.51                              | 19.34         | 19.34        |
| 2         | 3.02                | 23.25         | 51.85        | 2.40                              | 18.43         | 37.77        |
| 3         | 1.76                | 13.54         | 65.39        | 1.97                              | 15.13         | 52.91        |
| 4         | 1.48                | 11.38         | 76.77        | 1.94                              | 14.91         | 67.81        |

*S.8 Varimax rotated factor loadings for the factor analysis (final) in the survey*

| Item                          | Factor  |                     |                          |               | Common factor variance |            |
|-------------------------------|---------|---------------------|--------------------------|---------------|------------------------|------------|
|                               | Concern | Perceived knowledge | Perception of blood need | Donation risk | Initial                | Extraction |
| Rated anxious                 | 0.85    | -0.02               | 0.06                     | 0.12          | 0.63                   | 0.74       |
| Rated worried                 | 0.84    | -0.02               | 0.04                     | 0.15          | 0.63                   | 0.73       |
| Rated fearful                 | 0.83    | -0.03               | 0.02                     | 0.15          | 0.61                   | 0.71       |
| Get infected of COVID-19      | 0.55    | 0.01                | -0.03                    | 0.33          | 0.38                   | 0.41       |
| Knowledge about policy        | -0.04   | 0.91                | 0.11                     | -0.09         | 0.75                   | 0.86       |
| Knowledge about procedure     | 0.01    | 0.88                | 0.14                     | -0.06         | 0.72                   | 0.79       |
| Knowledge about requirements  | -0.02   | 0.86                | 0.16                     | -0.07         | 0.70                   | 0.76       |
| How urgent                    | 0.04    | 0.12                | 0.92                     | -0.02         | 0.66                   | 0.86       |
| How important                 | 0.00    | 0.13                | 0.85                     | -0.06         | 0.64                   | 0.74       |
| How much lost                 | 0.04    | 0.10                | 0.58                     | -0.04         | 0.32                   | 0.35       |
| Get infected at donation site | 0.17    | -0.09               | -0.03                    | 0.85          | 0.58                   | 0.76       |
| Ensure safety                 | 0.21    | -0.04               | -0.01                    | 0.79          | 0.55                   | 0.67       |
| Risk after donation           | 0.16    | -0.07               | -0.08                    | 0.63          | 0.38                   | 0.44       |

*S.9 Linear regression models of factors and SWBDs' characteristics in the survey*

| Predictor            | Concern   | Perceived knowledge | Perception of blood need | Donation risk |
|----------------------|-----------|---------------------|--------------------------|---------------|
|                      | $\beta$   | $\beta$             | $\beta$                  | $\beta$       |
| Constant             | 3.15**    | 3.52**              | 4.06**                   | 2.48**        |
| Gender               |           |                     |                          |               |
| Male                 | 0.17*     | -0.07               | 0.05                     | 0.07          |
| Female               | Reference | Reference           | Reference                | Reference     |
| Age                  | 0.00      | 0.01*               | 0.00                     | -0.01**       |
| Education level      | -0.13**   | 0.04                | 0.05*                    | -0.01         |
| Donation frequency   | -0.01*    | 0.03**              | 0.00                     | 0.00          |
| Relational closeness |           |                     |                          |               |
| Yes                  | -0.01     | 0.12*               | 0.10**                   | -0.04         |
| No                   | Reference | Reference           | Reference                | Reference     |

\*  $P < .05$ , \*\*  $P < .01$

*S.10 Independent-sample t test results of the purpose of the latest blood donation  
between first-time and repeat SWBDs in the survey*

| Purposes                   | First-time<br>SWBDs | Repeat<br>SWBDs | $t_{1582}$ | $P$   |
|----------------------------|---------------------|-----------------|------------|-------|
| Saving lives               | 2.54 ± 0.65         | 2.55 ± 0.70     | -0.16      | .877  |
| Media appealing            | 1.98 ± 0.69         | 2.02 ± 0.72     | -0.73      | .469  |
| Benefiting health          | 1.92 ± 0.67         | 2.04 ± 0.69     | -2.70      | .007  |
| Message appealing          | 1.47 ± 0.60         | 1.86 ± 0.72     | -8.68      | <.001 |
| Telephone call appealing   | 1.45 ± 0.58         | 1.63 ± 0.71     | -4.64      | <.001 |
| Free blood test            | 1.43 ± 0.63         | 1.29 ± 0.55     | 3.43       | <.001 |
| Souvenir of blood donation | 1.15 ± 0.41         | 1.23 ± 0.47     | -2.91      | .004  |

*S.11 Summary and comparisons of experienced SWBDs who completed the questionnaires in group 1 and 2 in the trial*

|                                 | Group 1    | Group 2    | <i>P</i>          |
|---------------------------------|------------|------------|-------------------|
| Gender                          |            |            |                   |
| Female                          | 300 (60.6) | 304 (61.9) | .695 <sup>†</sup> |
| Male                            | 195 (39.4) | 187 (38.1) |                   |
| Age <sup>*</sup>                | 32.4 ± 9.7 | 32.0 ± 9.4 | .580 <sup>‡</sup> |
| Donation frequency <sup>*</sup> | 5.2 ± 5.3  | 4.7 ± 5.1  | .231 <sup>‡</sup> |
| Occupation                      |            |            |                   |
| Fixed job                       | 243 (49.1) | 215 (43.8) | .087 <sup>†</sup> |
| Student                         | 53 (10.7)  | 50 (10.2)  |                   |
| Non-working                     | 40 (8.1)   | 29 (5.9)   |                   |
| Others                          | 159 (32.1) | 197 (40.1) |                   |
| Education level                 |            |            |                   |
| Junior high or below            | 56 (11.3)  | 67 (13.6)  | .551 <sup>†</sup> |
| Secondary school                | 115 (23.2) | 115 (23.4) |                   |
| College                         | 303 (61.2) | 294 (59.9) |                   |
| Master or above                 | 21 (4.2)   | 15 (3.1)   |                   |
| Relational closeness            |            |            |                   |
| No                              | 234 (47.3) | 237 (48.3) | .754 <sup>†</sup> |
| Yes                             | 261 (51.7) | 254 (52.7) |                   |

Data presented as no. (%), unless otherwise stated.

<sup>†</sup> Chi-square test *P*.

<sup>‡</sup> Independent-sample *t* test *P*.

\* Data presented as mean ± standard deviation.

*S.12 Factor loadings for the confirmatory factor analysis in the trial*

| Item                          | Factor loading |
|-------------------------------|----------------|
| Concern                       |                |
| Rated anxious                 | 0.84           |
| Rated worried                 | 0.83           |
| Rated fearful                 | 0.79           |
| Get infected of COVID-19      | 0.60           |
| Perceived knowledge           |                |
| Knowledge about policy        | 0.91           |
| Knowledge about requirements  | 0.85           |
| Knowledge about procedure     | 0.70           |
| Perception of blood need      |                |
| How urgent                    | 0.92           |
| How important                 | 0.87           |
| How much lost                 | 0.70           |
| Donation risk                 |                |
| Get infected at donation site | 0.86           |
| Ensure safety                 | 0.79           |
| Risk after donation           | 0.76           |

*S.13 Factor Intercorrelation in the trial*

| Factor                     | 1      | 2      | 3      | 4      |
|----------------------------|--------|--------|--------|--------|
| 1. Concern                 | (0.76) | 0.01   | 0.21   | 0.31   |
| 2. Perceived knowledge     |        | (0.83) | -0.16  | -0.21  |
| 3 Perception of blood need |        |        | (0.84) | -0.16  |
| 4. Donation risk           |        |        |        | (0.80) |

*S.14 Collinearity diagnostics*

|    | Eigenvalue | Condition index | Proportion of variation |       |        |      |                   |                    |                      |         |                     |                          |               |
|----|------------|-----------------|-------------------------|-------|--------|------|-------------------|--------------------|----------------------|---------|---------------------|--------------------------|---------------|
|    |            |                 | Constant                | Frame | Gender | Age  | Educational level | Donation frequency | Relational closeness | Concern | Perceived knowledge | Perception of blood need | Donation risk |
| 1  | 9.13       | 1.00            | 0.00                    | 0.00  | 0.00   | 0.00 | 0.00              | 0.00               | 0.00                 | 0.00    | 0.00                | 0.00                     | 0.00          |
| 2  | 0.52       | 4.17            | 0.00                    | 0.01  | 0.00   | 0.00 | 0.00              | 0.67               | 0.03                 | 0.00    | 0.00                | 0.00                     | 0.00          |
| 3  | 0.49       | 4.33            | 0.00                    | 0.68  | 0.00   | 0.00 | 0.00              | 0.00               | 0.29                 | 0.00    | 0.00                | 0.00                     | 0.00          |
| 4  | 0.44       | 4.55            | 0.00                    | 0.25  | 0.01   | 0.00 | 0.00              | 0.01               | 0.65                 | 0.00    | 0.00                | 0.00                     | 0.01          |
| 5  | 0.10       | 9.34            | 0.00                    | 0.00  | 0.56   | 0.08 | 0.05              | 0.10               | 0.01                 | 0.09    | 0.01                | 0.00                     | 0.00          |
| 6  | 0.10       | 9.64            | 0.00                    | 0.02  | 0.01   | 0.10 | 0.00              | 0.15               | 0.01                 | 0.11    | 0.05                | 0.01                     | 0.31          |
| 7  | 0.08       | 10.44           | 0.00                    | 0.00  | 0.29   | 0.02 | 0.55              | 0.00               | 0.00                 | 0.08    | 0.00                | 0.00                     | 0.01          |
| 8  | 0.06       | 12.57           | 0.00                    | 0.02  | 0.01   | 0.36 | 0.01              | 0.04               | 0.00                 | 0.30    | 0.04                | 0.04                     | 0.27          |
| 9  | 0.04       | 14.68           | 0.00                    | 0.00  | 0.02   | 0.18 | 0.27              | 0.01               | 0.00                 | 0.35    | 0.26                | 0.05                     | 0.21          |
| 10 | 0.03       | 18.25           | 0.01                    | 0.02  | 0.05   | 0.00 | 0.00              | 0.00               | 0.01                 | 0.05    | 0.52                | 0.58                     | 0.00          |
| 11 | 0.01       | 34.64           | 0.99                    | 0.00  | 0.04   | 0.25 | 0.11              | 0.02               | 0.01                 | 0.00    | 0.10                | 0.31                     | 0.18          |

*S.15 Zero-order Pearson correlations between variables in the trial*

| Factor                      | 2    | 3    | 4     | 57    | 65    | 76     |
|-----------------------------|------|------|-------|-------|-------|--------|
| 1. Donation intention       | 0.4* | 0.03 | -0.02 | 0.24* | 0.20* | -0.25* |
| 2. Group                    | 1    | 0.01 | 0.01  | 0.01  | 0.16* | -0.13* |
| 3. Relational closeness     |      | 1    | 0.00  | 0.03  | 0.04  | -0.04  |
| 4. Concern                  |      |      | 1     | 0.01  | 0.14* | 0.31*  |
| 5. Perceived knowledge      |      |      |       | 1     | 0.21* | -0.21* |
| 6. Perception of blood need |      |      |       |       | 1     | -0.16* |
| 7. Donation risk            |      |      |       |       |       | 1      |

\*  $P < .001$

*S.16 Linear regression models of groups, blood need, and donation intention  
in the trial*

| Independent variables   | Dependent variables                      |       |                                          |       |                                          |       |
|-------------------------|------------------------------------------|-------|------------------------------------------|-------|------------------------------------------|-------|
|                         | Blood need                               |       | Donation intention                       |       | Donation intention                       |       |
|                         | $\beta$                                  | $P$   | $\beta$                                  | $P$   | $\beta$                                  | $P$   |
| Group                   | 0.19                                     | <.001 | 0.32                                     | <.001 | 0.27                                     | <.001 |
| Blood need              |                                          |       |                                          |       | 0.29                                     | <.001 |
| Adjusted R <sup>2</sup> | 0.02                                     |       | 0.02                                     |       | 0.04                                     |       |
| F                       | F <sub>(1,984)</sub> = 22.15, $P < .001$ |       | F <sub>(1,984)</sub> = 18.97, $P < .001$ |       | F <sub>(2,983)</sub> = 21.64, $P < .001$ |       |

*S.17 Linear regression models of groups, donation risk, and donation intention  
in the trial*

| Independent variables   | Dependent variables                     |       |                                         |       |                                         |       |
|-------------------------|-----------------------------------------|-------|-----------------------------------------|-------|-----------------------------------------|-------|
|                         | Donation risk                           |       | Donation intention                      |       | Donation intention                      |       |
|                         | $\beta$                                 | $P$   | $\beta$                                 | $P$   | $\beta$                                 | $P$   |
| Group                   | -0.21                                   | <.001 | 0.32                                    | <.001 | 0.25                                    | .001  |
| Donation risk           |                                         |       |                                         |       | -0.33                                   | <.001 |
| Adjusted R <sup>2</sup> | 0.02                                    |       | 0.02                                    |       | 0.07                                    |       |
| F                       | F <sub>(1,984)</sub> = 16.76, $P$ <.001 |       | F <sub>(1,984)</sub> = 18.97, $P$ <.001 |       | F <sub>(2,983)</sub> = 39.20, $P$ <.001 |       |

*S.18 Logistic regression analyses of associations of groups, donor characteristics,  
and intervention status with re-donation among all SWBDs in the trial*

|                                     | OR (95% CI)<br>1 vs. 2 vs. 3 | OR (95% CI)<br>1 vs. 2 | OR (95% CI)<br>1 vs. 3 | OR (95% CI)<br>2 vs. 3 |
|-------------------------------------|------------------------------|------------------------|------------------------|------------------------|
| Group                               |                              |                        |                        |                        |
| Group 1                             | 1.13 (0.87–1.47)             | 1.06 (0.84–1.35)       | 1.10 (0.84–1.44)       | -                      |
| Group 2                             | 1.07 (0.82–1.39)             | Reference              | -                      | 1.10 (0.84–1.44)       |
| Group 3                             | Reference                    | -                      | Reference              | Reference              |
| Gender                              |                              |                        |                        |                        |
| Male                                | 0.95 (0.77–1.18)             | 0.98 (0.76–1.25)       | 0.86 (0.66–1.11)       | 1.03 (0.79–1.35)       |
| Female                              | Reference                    | Reference              | Reference              | Reference              |
| Age                                 | 1.03 (1.02–1.04)*            | 1.03 (1.02–1.04)*      | 1.03 (1.02–1.04)*      | 1.03 (1.02–1.04)*      |
| Donation history                    | 1.08 (1.06–1.10)*            | 1.08 (1.06–1.11)*      | 1.07 (1.04–1.09)*      | 1.09 (1.06–1.12)*      |
| Status of intervention <sup>†</sup> |                              |                        |                        |                        |
| Completed                           | 3.20 (2.56–4.52)*            | 3.38 (2.54–4.51)*      | 3.85 (2.61–5.68)*      | 3.02 (1.99–4.60)*      |
| Non-completed                       | Reference                    | Reference              | Reference              | Reference              |

\*  $P < .001$ .

<sup>†</sup> Referred to those who completed the questionnaire

*S.19 Independent-sample t test results of the common factors between SWBDs  
in the survey and the trial*

| Factors                  | Survey      | Trial       | $t_{2564}$ | $P$   |
|--------------------------|-------------|-------------|------------|-------|
| Concern                  | 2.84 ± 0.94 | 3.04 ± 0.92 | -5.31      | <.001 |
| Perceived knowledge      | 4.07 ± 0.84 | 3.85 ± 0.84 | 6.36       | <.001 |
| Perception of blood need | 4.41 ± 0.64 | 4.13 ± 0.75 | 9.59       | <.001 |
| Donation risk            | 2.14 ± 0.76 | 2.60 ± 0.83 | -14.03     | <.001 |
