# Supplementary material
Source: PubMed Central journal article supplement (PMC7361411)
Supplement: TRF-60-2597-s002.pdf [file TRF-60-2597-s002.pdf]

## Appendix 2

### Informed consent

Thank you for supporting blood donation. In order to better investigate the situation of blood donation during the epidemic, you have been sincerely invited to participate in this questionnaire survey. Your participation will play a positive role in promotion of blood donation in Guangzhou. Answers to all questions will be kept strictly confidential and will be used and only used for research purposes.

I have read the informed consent form, and I am completely voluntarily participating in this survey.

Yes.

No.

Show the questionnaire.

Closed the website.

**[The questions are all the same in both Questionnaire 1 and Questionnaire 2, except that extra information about blood donation precautionary measures in response to COVID-**

**19 in Questionnaire 1 is in parenthesis. Vignettes are only in Questionnaire 1.]**

- Q1. How fearful do you feel about the COVID-19 epidemic?

Not at all.

Extremely.

1      2      3      4      5

- Q2. How anxious do you feel about the COVID-19 epidemic?

Not at all.

Extremely.

1      2      3      4      5

- Q3. How worried do you feel about the COVID-19 epidemic?

Not at all.

Extremely.

1      2      3      4      5

- Q4. How worried do you feel about infecting COVID-19?

Not at all.

Extremely.

1      2      3      4      5

- Q5. What do you know about the blood donation policy?

Nothing at all.

Extremely knowledgeable.

1      2      3      4      5

- Q6. What do you know about the blood donation procedure?

Nothing at all.

Extremely knowledgeable.

1      2      3      4      5

- Q7. What do you know about the blood donation requirements?

Nothing at all.

Extremely knowledgeable.

1      2      3      4      5

- Q8. Have any of your family members or close friends ever received a blood transfusion or been waiting for blood during the epidemic?

Yes.

No.

(In addition of the urgent need for blood treatment in patients with trauma, hemopathy, severe complications of pregnancy, and major surgery, **COVID-19 patients are also in urgent need of blood treatment**. Due to respiratory failure, patients with severe COVID-19 may require extracorporeal membrane oxygenation (ECMO) treatment, which requires **a large amount of blood product (mainly red blood cell)**.<sup>1</sup> In the case of patients with multiple organ failure and disseminated intravascular coagulation (DIC), fresh frozen plasma and cryotherapy are needed to save their lives.)

- Q9. How important do you think blood donation is during COVID-19 epidemic in Guangzhou?

Not at all. Extremely.

1      2      3      4      5

- Q10. How urgent do you think blood donation during COVID-19 epidemic in Guangzhou?

Not at all. Extremely.

1      2      3      4      5

- Q11. How much lost will there be if no one donates blood during the epidemic?

Not at all. Extremely.

1      2      3      4      5

- Q12. Thank you for participating in blood donation. Your support is the strength for us to go forward. This is a test question- please select the number that corresponds to the current month.

1      2      3      4      5

(Every day blood center will apply **ultraviolet and other methods** (e.g. cleansing, spraying etc.) to **disinfect** the mobile blood drives and fix donation sites.)

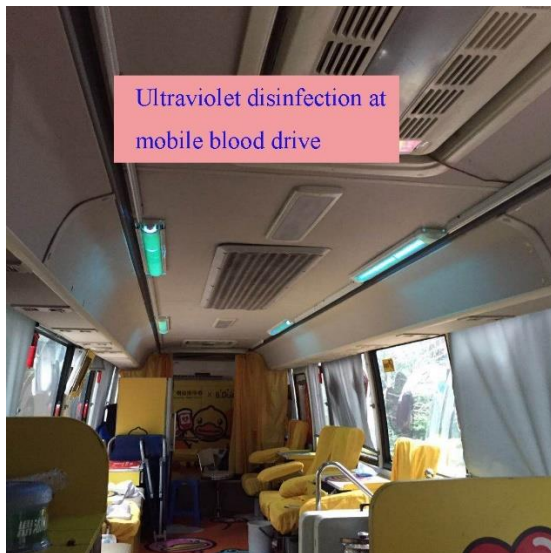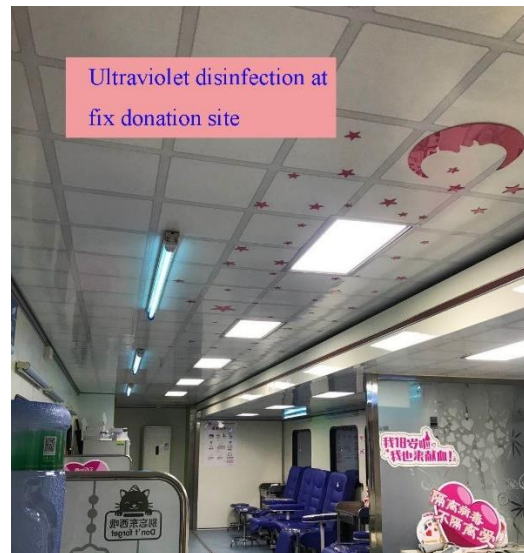

(All staff have been trained in epidemic prevention and strictly examined. They need to report their health status every day and take their temperature before work.

All blood donors should take their temperature before donating blood and fill in the additional form of “**Blood donation consultation form during the prevention and control of COVID-19 epidemic**” to ensure that there is no contact history in the epidemic area and no suspected symptoms.)

### 新型冠状病毒肺炎疫情防控期间无偿献血征询附加表

## Blood donation consultation form during the prevention and control of COVID-19 epidemic

请您认真阅读以下内容，并如实填写相关征询信息（请在二内以“√”表示）

- 2、您最近 28 天内是否去过湖北等疫情重点地区？ 是  否
- 3、您最近 28 天内是否有乘飞机、火车、轮船、长途大巴等交通工具往返、途经或经停湖北等疫情重点地区？ 是  否
- 4、您最近 28 天内是否与从湖北等疫情重点地区返回不足 14 天的人员有过密切接触？ 是  否
- 5、与您有密切接触的人员是否有发热、被诊断为新型冠状病毒肺炎疑似病例或确诊病例？ 是  否

## Questions about contact history in the epidemic area and suspected symptoms

特别告知：

- 1、如果您有体温升高或干咳，请暂缓献血，并及时到指定的发热门诊就医。
- 2、如果您有上述第 2~6 项情况中的任意 1 项，请暂缓献血，并请您进行居家医学观察，并每天测量体温，若有不适，请及时就医。
- 3、如果您献血后 14 天内有被诊断为新型冠状病毒肺炎疑似患者或确诊病例，请您立即拨打血站的回告电话 020-83578941（周一至周五 8:00-17:00）或 020-83594685（晚间或节假日），告知血站工作人员。

本人理解健康征询与血液安全的关联性与重要性，承诺在《新型冠状病毒肺炎疫情防控期间无偿献血征询附加表》提供的所有资料和信息是真实的，本人愿意承担因提供虚假资料和信息所带来的一切后果。

献血者签名：

签名日期：

医务人员签名：

(All the blood collection equipment are **disposable products** in line with the national standards. During the epidemic period, all staff should **keep wearing masks, headgear and sterilizing gloves**, and use alcohol to disinfect their hands at any time. In addition to strengthening the disinfection of the blood collection process, **each nurse only collects one blood donor's blood at a time**. Moreover, the hand gripper is wrapped with disposable PE gloves which will be discarded and replaced after used by a blood donor once to guarantee the safety of blood donors.)

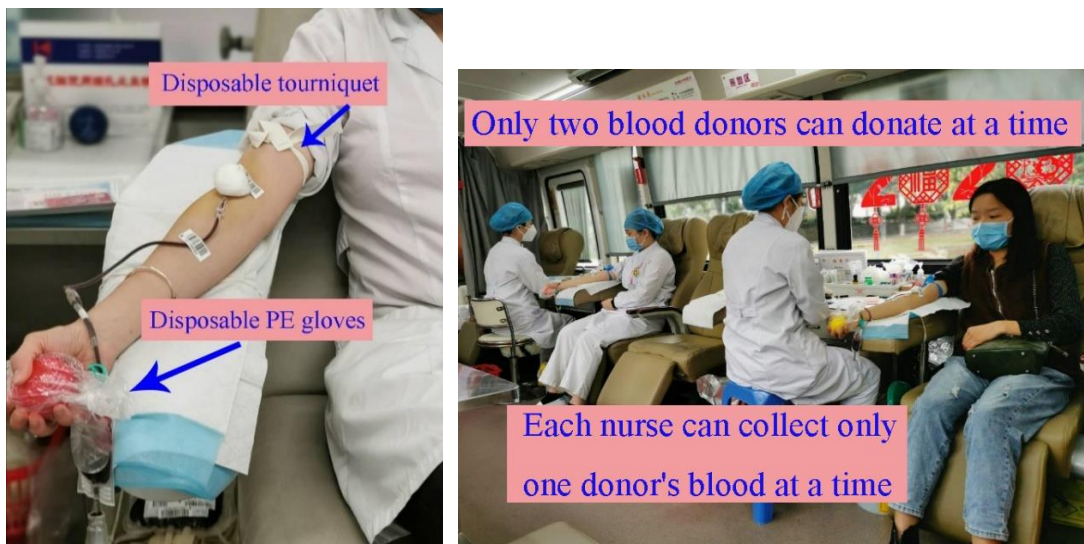

- Q13. How likely do you think you will get infected of COVID-19 at the donation site when you donate blood?

Very likely.

Very unlikely.

1      2      3      4      5

- Q14. How likely do you think that the staff of blood center can ensure your safety during donation? (*Revised score*)

Very likely.

Very unlikely.

1      2      3      4      5



- Q15. How likely do you think you will get infected of COVID-19 after blood donation?

Very likely.

Very unlikely.

1

2

3

4

5

**(LI Ming, the vice mayor of Guangzhou, donated her blood during the epidemic.)**

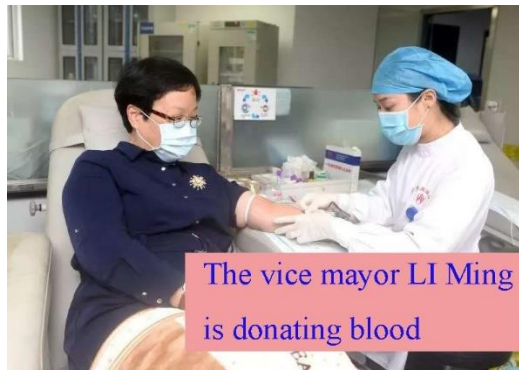

**(Medical staff took the lead in blood donation during the epidemic)**

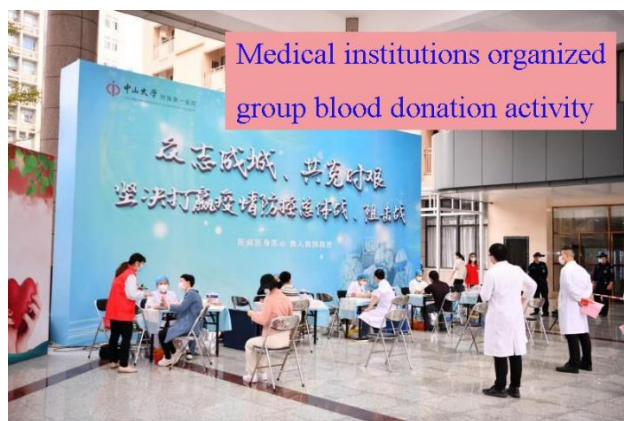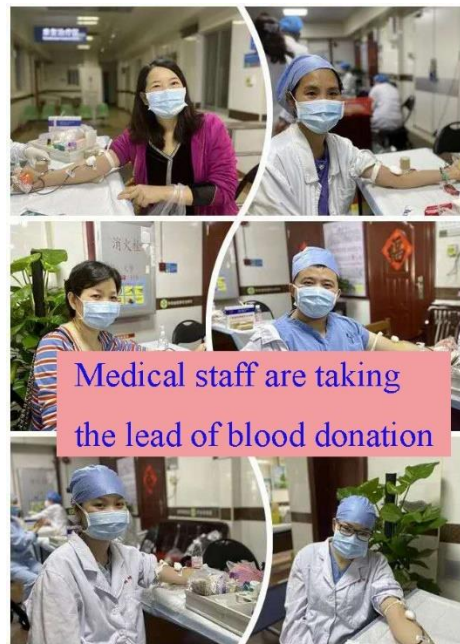

(Staff of blood center actively participated in blood donation)

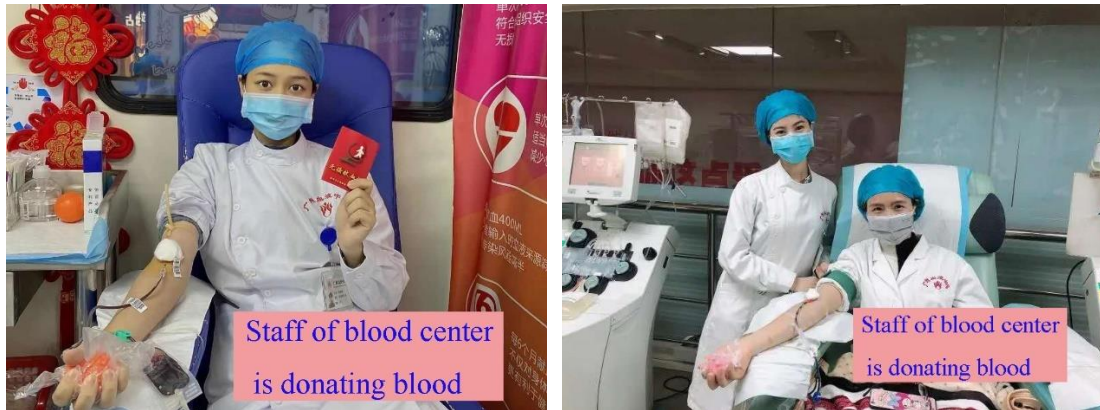

(In addition of ordinary souvenir, all blood donors who donate during the epidemic will get an extra certificate in acknowledgement of their donation.)

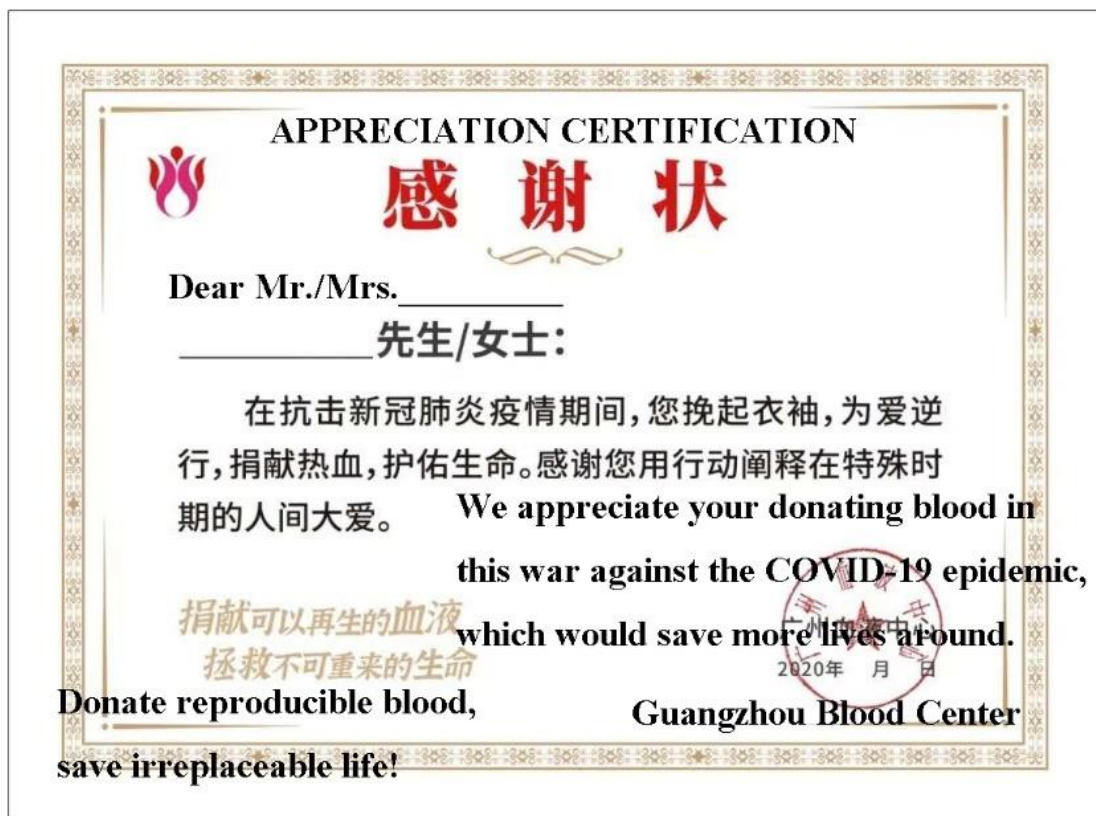

- Q16. How likely will you donate blood within 3 weeks?

Very likely.

Very unlikely.

1      2      3      4      5



### **Socio-demographic variables and blood donation variable**

- Your gender: female or male.
- Your age: (fill in the blank).
- Your education level:  
junior high or below, secondary school, college, master or above.
- Your occupation (dummy variables):  
Fixed job, student, none, others (fill in the blank).
- How many times have you ever donated blood? (fill in the blank).

1. Lo Pinto, Allyn, Persichini, et al. Predictors of red blood cell transfusion and its association with prognosis in patients undergoing extracorporeal membrane oxygenation. *Int J Artif Organs*. 2018;41(10):644-652.

**Page of personal information**

**Please provide your name and cell phone number for follow-up, and you will have the chance to win a small souvenir by a lucky draw.**
